# Supplementary material for: Signal Transduction and Activator of Transcription-3 (STAT3) in Patients with Colorectal Cancer: Associations with the Phenotypic Features of the Tumor and Host
Source: Oxford University Press journal article supplement (doi:10.1158/1078-0432.ccr-16-1416), 2016-09-27
Supplement: 10780432ccr161416-sup-167331_1_supp_3675377_8dv3g9.docx [file 10780432ccr161416-sup-167331_1_supp_3675377_8dv3g9.docx]

**Supplementary Figure 1** The relationship between tumour cell STAT3 expression and cancer-specific survival of patients undergoing elective, potentially curative resection of stage I-III colorectal cancer (Kaplan-Meier log-rank analysis): (a) Stage T1-2 (*P*<0.001), (b) Stage T3-4 (*P*=0.192), (c) Node negative (*P*=0.516), and (d) Node positive (*P*=0.001)*.*
